# Supplementary material
Source: PubMed Central journal article supplement (PMC3278861)
Supplement: NIHMS353082-supplement-1.pdf [file NIHMS353082-supplement-1.pdf]

violet (in 30% methanol) for 15 min. After extensively washing with H<sub>2</sub>O, DNA-bound dye was extracted with 1 mL of 10% acetic acid and measured for optical density (OD) at 590 nm. The cell numbers at different days were normalized to the cell number from the first measurement. The results were shown as the mean  $\pm$  SEM,  $n = 3$ .

## Acknowledgments

We thank Joachim Seemann and Graham Warren for antibodies and cDNA constructs, Blanche Schwappach for the retroviral vector and the rtTA HeLa cell line, Hana Popelkova for technical help with gel filtration, Majan Varedi and Xiaoxia Lin for developing the Matlab program to quantify beads in aggregates and Yi Xiang and other members of the Wang Lab for suggestions and reagents. This work was supported by the Pardee Cancer Research Foundation, the National Institute of Health (GM087364), the American Cancer Society (RGS-09-278-01-CSM), the University of Michigan Rackham Faculty Research Grant, the NIH-funded Michigan Alzheimer's Disease Research Center (P50 AG08761) and an anonymous donation to Y. W. The authors declare no conflicts of interest.

## Supporting Information

Additional Supporting Information may be found in the online version of this article:

**Figure S1: Expression of non-regulatable GRASP65 mutants enhances Golgi stacking in interphase cells.** Bar charts of Figure 2K indicating the actual frequency of each value of number of cisternae per stack in HeLa cells expressing GFP or indicated GFP-tagged GRASP65 constructs. Note that the expression of non-regulatable GRASP65 mutants, but not the wild-type protein, increased the number of cisternae in the stacks.

**Figure S2: Knockdown of GRASP65 reduces the number of cisternae per stack, which can be rescued by expression of exogenous GRASP65.** A) Bar charts of Figure 5Q showing the actual frequency of Golgi cisternal numbers in the stacks in HeLa cells transfected with control or GRASP65 siRNA. Note the shift of the bars to lower numbers when GRASP65 was depleted (lower panel) compared with the control siRNA-transfected cells (upper panel). B) Bar charts of Figure 5R showing the actual frequency of Golgi cisternal numbers in the stacks in HeLa cells in which endogenous GRASP65 was replaced by GFP, rat GRASP65 or its mutants, as indicated. Note that the expression of GRASP65 and its mutant increased the number of cisternae in the stacks compared to the GFP cell line.

Please note: Wiley-Blackwell are not responsible for the content or functionality of any supporting materials supplied by the authors. Any queries (other than missing material) should be directed to the corresponding author for the article.

## References

- Ladinsky MS, Mastronarde DN, McIntosh JR, Howell KE, Staehelin LA. Golgi structure in three dimensions: functional insights from the normal rat kidney cell. *J Cell Biol* 1999;144:1135–1149.
- Lucocq JM, Warren G. Fragmentation and partitioning of the Golgi apparatus during mitosis in HeLa cells. *EMBO J* 1987;6:3239–3246.
- Tang D, Mar K, Warren G, Wang Y. Molecular mechanism of mitotic Golgi disassembly and reassembly revealed by a defined reconstitution assay. *J Biol Chem* 2008;283:6085–6094.
- Barr FA, Puype M, Vandekerckhove J, Warren G. GRASP65, a protein involved in the stacking of Golgi cisternae. *Cell* 1997;91:253–262.
- Wang Y, Seemann J, Pypaert M, Shorter J, Warren G. A direct role for GRASP65 as a mitotically regulated Golgi stacking factor. *EMBO J* 2003;22:3279–3290.
- Wang Y, Satoh A, Warren G. Mapping the functional domains of the Golgi stacking factor GRASP65. *J Biol Chem* 2005;280:4921–4928.
- Sengupta D, Truschel S, Bachert C, Linstedt AD. Organelle tethering by a homotypic PDZ interaction underlies formation of the Golgi membrane network. *J Cell Biol* 2009;186:41–55.
- Lane JD, Lucocq J, Pryde J, Barr FA, Woodman PG, Allan VJ, Lowe M. Caspase-mediated cleavage of the stacking protein GRASP65 is required for Golgi fragmentation during apoptosis. *J Cell Biol* 2002;156:495–509.
- Shorter J, Watson R, Giannakou ME, Clarke M, Warren G, Barr FA. GRASP55, a second mammalian GRASP protein involved in the stacking of Golgi cisternae in a cell-free system. *EMBO J* 1999;18:4949–4960.
- Pfeffer SR. Constructing a Golgi complex. *J Cell Biol* 2001;155:873–875.
- Xiang Y, Wang Y. GRASP55 and GRASP65 play complementary and essential roles in Golgi cisternal stacking. *J Cell Biol* 2010;188:237–251.
- Tang D, Xiang Y, Wang Y. Reconstitution of the cell cycle regulated Golgi disassembly and reassembly in a cell free system. *Nat Protocols* 2010;5:758–772.
- Wang Y, Wei JH, Bisel B, Tang D, Seemann J. Golgi cisternal unstacking stimulates COPI vesicle budding and protein transport. *PLoS ONE* 2008;3:e1647.
- Xiang Y, Seemann J, Bisel B, Punthambaker S, Wang Y. Active ADP-ribosylation factor-1 (ARF1) is required for mitotic Golgi fragmentation. *J Biol Chem* 2007;282:21829–21837.
- Wang Y. Golgi apparatus inheritance. In: Mironov A, Pavelka M, Luini A, editors. *The Golgi Apparatus State of the art 110 Years After Camillo Golgi's Discovery*. Wien-New York: Springer-Verlag GmbH; 2008, pp. 580–607.
- Behnia R, Barr FA, Flanagan JJ, Barlowe C, Munro S. The yeast orthologue of GRASP65 forms a complex with a coiled-coil protein that contributes to ER to Golgi traffic. *J Cell Biol* 2007;176:255–261.
- Kondylis V, Spoorendonk KM, Rabouille C. dGRASP localization and function in the early exocytic pathway in *Drosophila* S2 cells. *Mol Biol Cell* 2005;16:4061–4072.
- Sutterlin C, Polishchuk R, Pecot M, Malhotra V. The Golgi-associated protein GRASP65 regulates spindle dynamics and is essential for cell division. *Mol Biol Cell* 2005;16:3211–3222.
- Puthenveedu MA, Bachert C, Puri S, Lanni F, Linstedt AD. GM130 and GRASP65-dependent lateral cisternal fusion allows uniform Golgi-enzyme distribution. *Nat Cell Biol* 2006;8:238–248.
- Shorter J, Warren G. Golgi architecture and inheritance. *Annu Rev Cell Dev Biol* 2002;18:379–420.
- Colanzi A, Corda D. Mitosis controls the Golgi and the Golgi controls mitosis. *Curr Opin Cell Biol* 2007;19:386–393.
- Feinstein TN, Linstedt AD. Mitogen-activated protein kinase 1-dependent Golgi unlinking occurs in G2 phase and promotes the G2/M cell cycle transition. *Mol Biol Cell* 2007;18:594–604.
- Sutterlin C, Hsu P, Mallabiabarrena A, Malhotra V. Fragmentation and dispersal of the pericentriolar Golgi complex is required for entry into mitosis in mammalian cells. *Cell* 2002;109:359–369.
- Yoshimura S, Yoshioka K, Barr FA, Lowe M, Nakayama K, Ohkuma S, Nakamura N. Convergence of cell cycle regulation and growth factor signals on GRASP65. *J Biol Chem* 2005;280:23048–23056.
- Preisinger C, Korner R, Wind M, Lehmann WD, Kopajtich R, Barr FA. Plk1 docking to GRASP65 phosphorylated by Cdk1 suggests a mechanism for Golgi checkpoint signalling. *EMBO J* 2005;24:753–765.
- Bisel B, Wang Y, Wei JH, Xiang Y, Tang D, Miron-Mendoza M, Yoshimura S, Nakamura N, Seemann J. ERK regulates Golgi and centrosome orientation towards the leading edge through GRASP65. *J Cell Biol* 2008;182:837–843.
- Kaplan W, Husler P, Klump H, Erhardt J, Sluis-Cremer N, Dirr H. Conformational stability of pGEX-expressed *Schistosoma japonicum* glutathione S-transferase: a detoxification enzyme and fusion-protein affinity tag. *Protein Sci* 1997;6:399–406.
- Husser K, Yuan H, Neagoe I, Tarasov AI, Ashcroft FM, Schwappach B. Scavenging of 14-3-3 proteins reveals their involvement in the cell-surface transport of ATP-sensitive K<sup>+</sup> channels. *J Cell Sci* 2006;119:4353–4363.
- Vielemeyer O, Yuan H, Moutel S, Saint-Fort R, Tang D, Nizak C, Goud B, Wang Y, Perez F. Direct selection of monoclonal phospho-specific antibodies without prior phosphoamino acid mapping. *J Biol Chem* 2009;284:20791–20795.
- Warren G. Membrane partitioning during cell division. *Annu Rev Biochem* 1993;62:323–348.
